# Supplementary material
Source: publisher figshare collection journal article supplement (https://acs.figshare.com/ndownloader/files/4187014)
Supplement: Supplementary file 1 [file 4187014]

**Table S2. Source of traffic data<sup>a</sup>**

| <b>Traffic variable</b>                                     | <b>Source</b>                                  | <b>Detail</b>                                                                                                                                                                                                                                        |
|-------------------------------------------------------------|------------------------------------------------|------------------------------------------------------------------------------------------------------------------------------------------------------------------------------------------------------------------------------------------------------|
| Traffic volume:<br>Road classification hierarchy (9 levels) | NSW Department of Lands (maps)                 | Motorways; primary roads; arterial roads; sub-arterial road; distributor roads; local roads; urban service lanes; tracks-vehicular; and paths.                                                                                                       |
| Traffic volume:<br>traffic counts                           | SCATS data: NSW Road & Traffic Authority (RTA) | SCATS is used to control phasing and timing of traffic signals and can record vehicle turning movements at intersections and vehicle volumes on road links approaching intersections. Routine recording 24 hours/day and 7 days/week.                |
|                                                             | Permanent counts (RTA)                         | The RTA records traffic link counts from permanent locations around the Sydney metropolitan area. Data from 5 sites used for this project.                                                                                                           |
|                                                             | Vehicle classification surveys (tube counts)   | Vehicle classification surveys (or tube count surveys) were undertaken on 61 roads in the study area over one week during November/December 2004 and at the same time of year in 2008.                                                               |
|                                                             | Traffic counts (local authority)               | Traffic counts from local authority where recorded. Where no counts available, estimates were provided by traffic engineer according to the following categories: <2000; 2000-4999; 5000-9999; 10,000-19,999; 20,000-29,999; 30,000-39,999; >40,000. |
| Tunnel data                                                 | Connector Motorways (LCT operator)             | Average daily traffic counts provided on a monthly basis on website:<br><a href="http://www.connectormotorways.com.au/node/2">http://www.connectormotorways.com.au/node/2</a> .                                                                      |

- a. Where traffic data was available from more than one source, preference was given to sources based on the following order: permanent counts; tube counts; SCATS counts; local authority estimates.
